# Supplementary material
Source: Springer Nature journal article supplement (https://www.springermedizin.de/resource/supplementary/12885_2013_4535_MOESM4_ESM.pdf/9466584)

A

## pHER2 vs HER2 (Base)

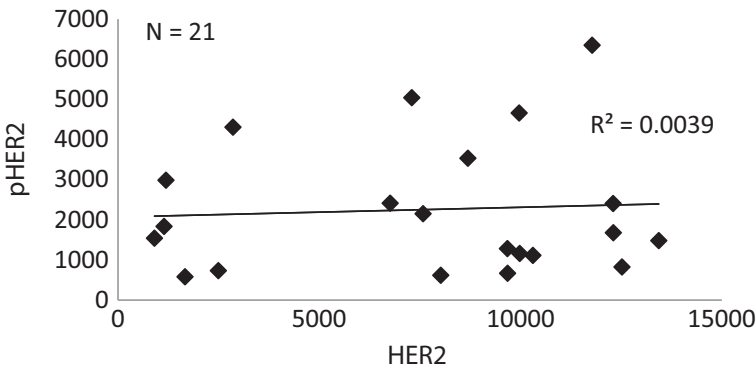

B

## pHER2 vs HER2 (Post)

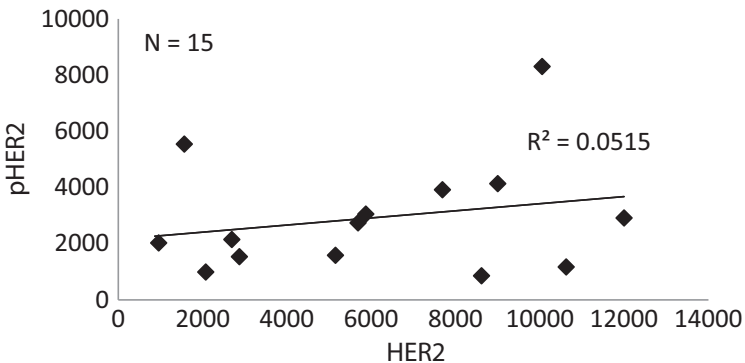

Supplement: MOESM4 [file 9466584]
